# Supplementary material for: The Effect of High and Low Ambient Temperature on Infant Health: A Systematic Review
Source: MDPI journal article supplement (doi:10.3390/ijerph19159109), 2022-07-26
Supplement: s1 [file s1]

**Table S1.** Search terms in Medline (PubMed).

| Concept                  | Search Terms                                                                                                                                                                                                                                                                                                                                                                                                                                                        |
|--------------------------|---------------------------------------------------------------------------------------------------------------------------------------------------------------------------------------------------------------------------------------------------------------------------------------------------------------------------------------------------------------------------------------------------------------------------------------------------------------------|
| Temperature (Exposure)   | (ambient temperature* or ambient heat or ambient cold or heatwave* or heat wave* or heat event* or cold spell* or (extreme adj3 temperature*) or extreme heat or extreme cold or outdoor temperature* or environmental temperature* or indoor temperature or hot temperature* or cold temperature* or weather or (extreme adj3 weather) or climat* or meteorologic* or heat exposure or cold exposure or heat index or cold index or heat episode* or cold episode) |
| Infant (Population)      | (infan* or neonat* or baby or babies or paediatric* or pediatric* or newborn*)                                                                                                                                                                                                                                                                                                                                                                                      |
| Adverse events (Outcome) | (adverse outcome* or mortalit* or death* or hospital admission* or hospital stay* or hospital visit or morbidit* or sudden infant death or SIDS or infect* or sepsis or emergenc* or hospitali#ation or asthma or cardiovascular or respiratory or hyperthermi* or hypothermi* or breastf?ed* or dehydration or hypoxia or anoxia or irritability or heat stress or cold stress or heat strain or heat exhaustion or heat stroke or heatstroke or overheating)      |

**Table S2.** Modified OHAT Risk of Bias Tool.

The sections italicised and highlighted in blue text are the changes that were made to the original tool.

| Internal Validity            | Question                                                                                 | Considerations                                                                                                                                                                                                                                                                                                                                                                                                                                                                        |
|------------------------------|------------------------------------------------------------------------------------------|---------------------------------------------------------------------------------------------------------------------------------------------------------------------------------------------------------------------------------------------------------------------------------------------------------------------------------------------------------------------------------------------------------------------------------------------------------------------------------------|
| Selection Bias               | Did selection of study participants result in appropriate comparison groups?             | Is the case definition adequate?<br>Is the control group comparable to the cases?                                                                                                                                                                                                                                                                                                                                                                                                     |
| Confounding Bias             | Did the study design/analysis account for important confounding and modifying variables? | Was confounding for seasonality controlled?<br>Was confounding for time trends, air pollution, other meteorological factors (rain, humidity), days of the week and holidays, influenza epidemics, sex (dependent on study design) controlled for?<br>Are the confounding variables measured validly and reliably?                                                                                                                                                                     |
| Detection Bias               | Can we be confident in the exposure characterisation?                                    | Was the weather data obtained from an appropriate weather station?<br>Were the exposure variables appropriately aggregated spatio-temporally?<br>Were heat days accurately measured?<br>Were the comparison days chosen appropriately?<br>Was there a change in the measurement of exposure variables over time that could affect the results?<br>Was the effect of time lag of exposure on outcome taken into consideration?                                                         |
|                              | Can we be confident in the outcome assessment?                                           | Was the outcome accurately measured to minimise information bias?<br>Were excess heat-related mortalities calculated accurately?<br>Was there a change in measurement of outcomes variables over time that could affect the results?<br>Were the exposure variables appropriately aggregated spatio-temporally?<br>Could the outcome measure have been influenced by knowledge of the exposure received?<br>Were the methods of outcome assessment comparable across exposure groups? |
| Selective reporting bias     | Were all measured outcomes reported?                                                     |                                                                                                                                                                                                                                                                                                                                                                                                                                                                                       |
| <i>Conflicts of interest</i> | <i>Were there any conflicts of interest?</i>                                             |                                                                                                                                                                                                                                                                                                                                                                                                                                                                                       |
| <i>Analysis</i>              | <i>Were the statistical methods appropriate?</i>                                         | Were any sensitivity analyses carried out?<br><b>Was the study sufficiently powered to detect an intervention effect (if one exists)?</b><br>Is a power calculation presented? If not, what is the expected effect size? Is the sample size adequate?                                                                                                                                                                                                                                 |
| Other                        | Were there no other potential threats to internal validity?                              | Did the researchers adhere to the study protocol?                                                                                                                                                                                                                                                                                                                                                                                                                                     |
